# Supplementary material for: Advanced and Invasive Cardiopulmonary Resuscitation (CPR) Techniques as an Adjunct to Advanced Cardiac Life Support
Source: MDPI journal article supplement (doi:10.3390/jcm11247315), 2022-12-09
Supplement: s1 [file s1]

Supplementary material

# Advanced and invasive Cardiopulmonary Resuscitation (CPR) Techniques as an Adjunct to Advanced Cardiac Life Support

Manuel Obermaier \*, Stephan Katzenschlager, Othmar Kofler, Frank Weilbacher and Erik Popp

## Search strategy

**Table S1.** Searched literature sources.

| Source                            | Search engine or database                                                                                                                                                                                                                                                                                                                                                                                                                                                                                                                                                                                                                                                                                         |
|-----------------------------------|-------------------------------------------------------------------------------------------------------------------------------------------------------------------------------------------------------------------------------------------------------------------------------------------------------------------------------------------------------------------------------------------------------------------------------------------------------------------------------------------------------------------------------------------------------------------------------------------------------------------------------------------------------------------------------------------------------------------|
| <b>Scientific databases</b>       | PubMed® MEDLINE                                                                                                                                                                                                                                                                                                                                                                                                                                                                                                                                                                                                                                                                                                   |
|                                   | Cochrane library                                                                                                                                                                                                                                                                                                                                                                                                                                                                                                                                                                                                                                                                                                  |
|                                   | Clarivate Web of Science™                                                                                                                                                                                                                                                                                                                                                                                                                                                                                                                                                                                                                                                                                         |
|                                   | Elsevier Embase®                                                                                                                                                                                                                                                                                                                                                                                                                                                                                                                                                                                                                                                                                                  |
|                                   | Elsevier Scopus®                                                                                                                                                                                                                                                                                                                                                                                                                                                                                                                                                                                                                                                                                                  |
| <b>Preprint servers</b>           | PrePubMed                                                                                                                                                                                                                                                                                                                                                                                                                                                                                                                                                                                                                                                                                                         |
|                                   | (containing: arXiv q-bio, PeerJ Preprints, bioRxiv, F1000Research, preprints.org, The Winnower, Nature Precedings, Wellcome Open)                                                                                                                                                                                                                                                                                                                                                                                                                                                                                                                                                                                 |
|                                   | medRxiv                                                                                                                                                                                                                                                                                                                                                                                                                                                                                                                                                                                                                                                                                                           |
|                                   | ResearchGate                                                                                                                                                                                                                                                                                                                                                                                                                                                                                                                                                                                                                                                                                                      |
| <b>Clinical trials registries</b> | International Clinical Trials Registry Platform (ICTRP)                                                                                                                                                                                                                                                                                                                                                                                                                                                                                                                                                                                                                                                           |
|                                   | (containing: Australian New Zealand Clinical Trials Registry, Chinese Clinical Trial Registry, ClinicalTrials.gov, EU Clinical Trials Register (EU-CTR), ISRCTN, The Netherlands National Trial Register, Brazilian Clinical Trials Registry (ReBec), Clinical Trials Registry - India, Clinical Research Information Service - Republic of Korea, Cuban Public Registry of Clinical Trials, German Clinical Trials Register, Iranian Registry of Clinical Trials, Japan Registry of Clinical Trials (jRCT), Pan African Clinical Trial Registry, Sri Lanka Clinical Trials Registry, Thai Clinical Trials Registry (TCTR), Peruvian Clinical Trials Registry (REPEC), Lebanese Clinical Trials Registry (LBCTR)) |
| <b>Guideline sources</b>          | European Resuscitation Council (ERC)                                                                                                                                                                                                                                                                                                                                                                                                                                                                                                                                                                                                                                                                              |
|                                   | International Liaison Committee on Resuscitation (ILCOR)                                                                                                                                                                                                                                                                                                                                                                                                                                                                                                                                                                                                                                                          |
|                                   | Arbeitsgemeinschaft der Wissenschaftlichen Medizinischen Fachgesellschaften (AWMF)                                                                                                                                                                                                                                                                                                                                                                                                                                                                                                                                                                                                                                |
| <b>Internet search engines</b>    | Google                                                                                                                                                                                                                                                                                                                                                                                                                                                                                                                                                                                                                                                                                                            |

**Table S2.** Search terms.

| General                        | Advanced techniques       | Invasive procedures       |
|--------------------------------|---------------------------|---------------------------|
| cardiac arrest                 | techniques                | procedures                |
| sudden heart death             | real-time feedback        | extracorporeal CPR        |
| out-of-hospital cardiac arrest | chest compression devices | ECLS                      |
| heart massage                  | mechanical CPR            | va-ECMO                   |
| circulation                    | automated CPR             | REBOA                     |
|                                | ultrasound                | pericardial puncture      |
|                                | sonography                | pericardiocentesis        |
|                                | POCUS                     | thoracostomy              |
|                                | arterial blood gas        | clamshell                 |
|                                | device                    | resuscitative thoracotomy |
